# Supplementary material for: Estimating body volumes and surface areas of animals from cross-sections
Source: PeerJ. 2024 May 28;12:e17479. doi: 10.7717/peerj.17479 (PMC11141563; doi:10.7717/peerj.17479)
Supplement: Supplemental Information 1 [file peerj-12-17479-s001.xlsx]

## Sheet:  Test 1
Humpback whale
Volume					Area
Number of Subslabs	Estimated Volume	Observed Volume	Error rate		Estimated Area	Observed Area	Error rate
2	0.016775	0.020415	-0.1783		0.44909	0.504937	-0.110602
4	0.021766	0.020415	0.0661768		0.517282	0.504937	0.0244486
6	0.022301	0.020415	0.0923831		0.525773	0.504937	0.0412646
8	0.022751	0.020415	0.114426		0.531328	0.504937	0.0522659
10	0.022863	0.020415	0.119912		0.532942	0.504937	0.0554624
12	0.022944	0.020415	0.12388		0.53397	0.504937	0.0574983
14	0.022988	0.020415	0.126035		0.534492	0.504937	0.0585321
16	0.022994	0.020415	0.126329		0.534517	0.504937	0.0585816
Orca
Volume					Area
Number of Subslabs	Estimated Volume	Observed Volume	Error rate		Estimated Area	Observed Area	Error rate
2	0.01448	0.021946	-0.340199		0.385399	0.501879	-0.232088
4	0.016751	0.021946	-0.236717		0.422629	0.501879	-0.157907
6	0.017261	0.021946	-0.213479		0.428901	0.501879	-0.14541
8	0.017389	0.021946	-0.207646		0.430564	0.501879	-0.142096
10	0.017481	0.021946	-0.203454		0.431674	0.501879	-0.139884
12	0.017523	0.021946	-0.20154		0.432202	0.501879	-0.138832
14	0.017547	0.021946	-0.200447		0.43251	0.501879	-0.138219
16	0.017565	0.021946	-0.199626		0.432731	0.501879	-0.137778
Liopleurodon
Volume					Area
Number of Subslab	Estimated Volume	Observed Volume	Error rate		Estimated Area	Observed Area	Error rate
2	0.01075	0.01423	-0.244554		0.334637	0.390254	-0.142515
4	0.013816	0.01423	-0.0290935		0.371618	0.390254	-0.0477535
6	0.014531	0.01423	0.0211525		0.381059	0.390254	-0.0235616
8	0.014644	0.01423	0.0290935		0.382411	0.390254	-0.0200972
10	0.014718	0.01423	0.0342937		0.383028	0.390254	-0.0185161
12	0.014764	0.01423	0.0375264		0.383448	0.390254	-0.0174399
14	0.014792	0.01423	0.039494		0.383615	0.390254	-0.017012
16	0.01481	0.01423	0.040759		0.383687	0.390254	-0.0168275
Atlantic sturgeon
Volume					Area
Number of Subslab	Estimated Volume	Observed Volume	Error rate		Estimated Area	Observed Area	Error rate
2	0.016948	0.017637	-0.0390656		0.153172	0.159386	-0.0389871
4	0.017028	0.017637	-0.0345297		0.153416	0.159386	-0.0374562
6	0.017405	0.017637	-0.0131542		0.154966	0.159386	-0.0277314
8	0.017267	0.017637	-0.0209786		0.154432	0.159386	-0.0310818
10	0.017383	0.017637	-0.0144015		0.154956	0.159386	-0.0277942
12	0.017377	0.017637	-0.0147417		0.154933	0.159386	-0.0279385
14	0.017359	0.017637	-0.0157623		0.154869	0.159386	-0.02834
16	0.017373	0.017637	-0.0149685		0.15492	0.159386	-0.02802

## Sheet: Test 2
Humpback whale
Volume					Area
Number of Slabs	Estimated Volume	Observed Volume	Error rate		Estimated Area	Observed Area	Error rate
2	0.019589	0.020415	-0.0404604		0.478128	0.504937	-0.0530938
4	0.020681	0.020415	0.0130296		0.495442	0.504937	-0.0188043
6	0.020509	0.020415	0.00460446		0.496199	0.504937	-0.0173051
8	0.020473	0.020415	0.00284105		0.49652	0.504937	-0.0166694
10	0.020467	0.020415	0.00254715		0.497239	0.504937	-0.0152455
12	0.020424	0.020415	0.000440852		0.49655	0.504937	-0.01661
14	0.020446	0.020415	0.00151849		0.496424	0.504937	-0.0168595
16	0.020422	0.020415	0.000342885		0.496069	0.504937	-0.0175626
Orca
Volume					Area
Number of Slabs	Estimated Volume	Observed Volume	Error rate		Estimated Area	Observed Area	Error rate
2	0.021281	0.021946	-0.0303016		0.49622	0.501879	-0.0112756
4	0.021993	0.021946	0.00214162		0.505553	0.501879	0.00732049
6	0.021939	0.021946	-0.000318965		0.505671	0.501879	0.00755561
8	0.021939	0.021946	-0.000318965		0.505635	0.501879	0.00748388
10	0.02191	0.021946	-0.00164039		0.505853	0.501879	0.00791824
12	0.021908	0.021946	-0.00173152		0.503063	0.501879	0.00235913
14	0.021904	0.021946	-0.00191379		0.503288	0.501879	0.00280745
16	0.021905	0.021946	-0.00186822		0.503219	0.501879	0.00266997
Liopleurodon
Volume					Area
Number of Subslab	Estimated Volume	Observed Volume	Error rate		Estimated Area	Observed Area	Error rate
2	0.014578	0.01423	0.0244554		0.387386	0.390254	-0.00734906
4	0.014354	0.01423	0.00871398		0.384906	0.390254	-0.0137039
6	0.014229	0.01423	-7.02741e-05		0.383101	0.390254	-0.0183291
8	0.014196	0.01423	-0.00238932		0.382817	0.390254	-0.0190568
10	0.014227	0.01423	-0.000210822		0.382702	0.390254	-0.0193515
12	0.01418	0.01423	-0.0035137		0.382305	0.390254	-0.0203688
14	0.01418	0.01423	-0.0035137		0.382104	0.390254	-0.0208838
16	0.014178	0.01423	-0.00365425		0.382626	0.390254	-0.0195462
Atlantic sturgeon
Volume					Area
Number of Subslab	Estimated Volume	Observed Volume	Error rate		Estimated Area	Observed Area	Error rate
2	0.01733	0.017637	-0.0174066		0.155366	0.159386	-0.0252218
4	0.017786	0.017637	0.00844815		0.157329	0.159386	-0.0129058
6	0.017395	0.017637	-0.0137212		0.156399	0.159386	-0.0187407
8	0.017712	0.017637	0.00425242		0.157327	0.159386	-0.0129183
10	0.017588	0.017637	-0.00277825		0.15701	0.159386	-0.0149072
12	0.017632	0.017637	-0.000283495		0.157241	0.159386	-0.0134579
14	0.017634	0.017637	-0.000170097		0.157253	0.159386	-0.0133826
16	0.017636	0.017637	-5.6699e-05		0.157325	0.159386	-0.0129309

## Sheet: Test 3
		GDI		Paleomass				Cross-sectional Method
Models	Observed Volume	Estimated Volume	Error Rate	Lower Bound	Upper Bound	Average	Error Rate	Estimated Volume	Error Rate
Humpback whale	0.020415	0.021313	0.0439873	0.021265	0.022329	0.021797	0.0676953	0.020424	0.000440852
Orca	0.021946	0.021902	-0.00200492	0.021849	0.022942	0.0223955	0.0204821	0.021908	-0.00173152
Harbor porpoise	0.063501	0.063936	0.00685029	0.063502	0.066678	0.06509	0.0250232	0.063322	-0.00281885
Bottlenose dolphin	0.037482	0.038401	0.0245184	0.037343	0.040104	0.0387235	0.0331226	0.037495	0.000346833
Southern right whale	0.058384	0.062138	0.0642984	0.061457	0.064531	0.062994	0.07896	0.058441	0.000976295
Liopleurodon	0.01423	0.014649	0.0294448	0.0146232	0.015355	0.0149891	0.053345	0.01418	-0.0035137
Thalassomedon	0.003563	0.003521	-0.0117878	0.003508	0.003683	0.0035955	0.00912153	0.003558	-0.00140331
Ophthalmosaurus	0.016185	0.01599	-0.0120482	0.015892	0.016686	0.016289	0.0064257	0.016329	0.00889713
Temnodontosaurus	0.011595	0.011556	-0.00336352	0.011541	0.012118	0.0118295	0.0202242	0.011606	0.000948685
		Mean	0.0220337			Mean	0.0349333	Mean	0.00234191
		GDI		Paleomass				Cross-sectional Method
Models	Observed Area	Estimated Area	Error Rate	Lower Bound	Upper Bound	Average	Error Rate	Estimated Area	Error Rate
Humpback whale	0.504937	0.507328	0.00473524	0.529449	0.543565	0.536507	0.0625227	0.497239	-0.0152455
Orca	0.501879	0.508617	0.0134255	0.512941	0.52659	0.519765	0.0356391	0.503063	0.00235913
Harbor porpoise	0.848617	0.841272	-0.00865526	0.834251	0.863318	0.848785	0.00019738	0.84158	-0.00829232
Bottlenose dolphin	0.667619	0.667447	-0.000257632	0.66401	0.684742	0.674376	0.010121	0.663421	-0.00628802
Southern right whale	0.823438	0.837872	0.0175289	0.833897	0.861103	0.8475	0.0292214	0.814159	-0.0112686
Liopleurodon	0.390254	0.387048	-0.00821516	0.39445	0.40525	0.39985	0.0245891	0.382305	-0.0203688
Thalassomedon	0.184784	0.181296	-0.0188761	0.18301	0.18796	0.185485	0.00379362	0.182405	-0.0128745
Ophthalmosaurus	0.484243	0.476105	-0.0168056	0.479283	0.492157	0.48572	0.00305012	0.478042	-0.0128056
Temnodontosaurus	0.354665	0.349568	-0.0143713	0.353542	0.363136	0.358339	0.0103591	0.349822	-0.0136551
		Mean	0.0114301			Mean	0.0199437	Mean	0.0114619

## Sheet: Test 4
		GDI		Paleomass				Cross-sectional Method
Models	Observed Volume	Estimated Volume	Error Rate	Lower Bound	Upper Bound	Average	Error Rate	Estimated Volume	Error Rate
Liopleurodon flipper	0.059734	0.069763	0.167894	\	\	0.074168	0.241638	0.0596	-0.00224328
Orca dorsal fin	0.014195	0.015913	0.121029	\	\	0.010001	-0.295456	0.014166	-0.00204297
Ophthalmosaurus tail fin	0.02188	0.024983	0.141819	\	\	0.025258	0.154388	0.021792	-0.00402194
Manta ray pectoral fin	0.027286	0.031862	0.167705	\	\	0.011645	-0.573224	0.027298	0.000439786
Atlantic sturgeon main body	0.017637	0.019867	0.126439	0.017791	0.020954	0.0193725	0.0984011	0.017632	-0.000283495
Hawksbill turtle main body	1.03818	1.23224	0.186913	1.09125	1.28483	1.18804	0.144343	1.03907	0.00084956
		Mean	0.151966			Mean	0.251242	Mean	0.00164684
		GDI		Paleomass				Cross-sectional Method
Models	Observed Area	Estimated Area	Error Rate	Lower Bound	Upper Bound	Average	Error Rate	Estimated Area	Error Rate
Liopleurodon flipper	1.53547	1.66967	0.0874009	\	\	1.60154	0.0430345	1.5376	0.0013872
Orca dorsal fin	0.672416	0.725166	0.0784485	\	\	0.58538	-0.129438	0.66483	-0.0112817
Ophthalmosaurus tail fin	0.860819	0.927279	0.0772055	\	\	0.867189	0.00739993	0.849152	-0.0135534
Manta ray pectoral fin	0.912636	0.973095	0.0662466	\	\	0.79963	-0.123824	0.895637	-0.0186263
Atlantic sturgeon main body	0.159386	0.158527	-0.00538943	0.162348	0.175158	0.168753	0.0587693	0.157241	-0.0134579
Hawksbill turtle main body	4.05079	4.30035	0.0616065	4.06344	4.69144	4.37744	0.0806386	3.99638	-0.013431
		Mean	0.0627162			Mean	0.0738506	Mean	0.0119562
